# Follicle-stimulating hormone and luteinizing hormone increase $\text{Ca}^{2+}$ in the granulosa cells of mouse ovarian follicles<sup>1</sup>

Jeremy R. Egbert<sup>2,3</sup>, Paul G. Fahey<sup>4</sup>, Jacob Reimer<sup>4</sup>, Corie M. Owen<sup>3</sup>, Alexei V. Evsikov<sup>5</sup>, Viacheslav O. Nikolaev<sup>6</sup>, Oliver Griesbeck<sup>7</sup>, Russell S. Ray<sup>4</sup>, Andreas S. Tolias<sup>4,8</sup>, and Laurinda A. Jaffe<sup>3</sup>

<sup>3</sup>Department of Cell Biology, UConn Health, Farmington, CT, USA

<sup>4</sup>Department of Neuroscience, Baylor College of Medicine, Houston, TX, USA

<sup>5</sup>Department of Research and Development, Bay Pines Veteran Administration Healthcare System, Bay Pines, FL, USA

<sup>6</sup>Institute of Experimental Cardiovascular Research, University Medical Center Hamburg-Eppendorf, Hamburg, Germany

<sup>7</sup>Max Planck Institute of Neurobiology, Martinsried, Germany

<sup>8</sup>Center for Neuroscience and Artificial Intelligence, Baylor College of Medicine, Houston, TX, USA

**Running title:** FSH and LH-induced  $\text{Ca}^{2+}$  rises in ovarian follicles

**Summary sentence:** Both FSH and LH increase  $\text{Ca}^{2+}$  in the granulosa cells of intact ovarian follicles from mice expressing genetically encoded sensors.

**Keywords:** calcium, follicle, follicle-stimulating hormone, gonadotropins, granulosa cells, luteinizing hormone

<sup>1</sup>Supported by NIH grant R37HD014939 to L.A.J., by grants from the Fund for Science to J.R.E. and to A.V.E., and by the Intelligence Advanced Research Projects Activity (IARPA) via Department of Interior/Interior Business Center (DoI/IBC) contract number D16PC00003 to A.S.T. The U.S. Government is authorized to reproduce and distribute reprints for Governmental purposes notwithstanding any copyright annotation thereon. Disclaimer: The views and conclusions contained herein are those of the authors and should not be interpreted as necessarily representing the official policies or endorsements, either expressed or implied, of IARPA, DoI/IBC, or the U.S. Government. Presented in part at the 51<sup>st</sup> Annual Meeting of the Society for the Study of Reproduction, 10-13 July, 2018, New Orleans, LA, USA.

<sup>2</sup>Correspondence: Jeremy R. Egbert, Department of Cell Biology, UConn Health, 263 Farmington Ave, Farmington, CT 06030-3636, USA. E-mail: [egbert@uchc.edu](mailto:egbert@uchc.edu)

## ABSTRACT

In mammalian ovarian follicles, follicle stimulating hormone (FSH) and luteinizing hormone (LH) signal primarily through the G-protein  $G_s$  to elevate cAMP, but both of these hormones can also elevate  $Ca^{2+}$  under some conditions. Here we investigate FSH- and LH-induced  $Ca^{2+}$  signaling in intact follicles of mice expressing genetically encoded  $Ca^{2+}$  sensors, Twitch-2B and GCaMP6s. At a physiological concentration (1 nM), FSH elevates  $Ca^{2+}$  within the granulosa cells of preantral and antral follicles. The  $Ca^{2+}$  rise begins several minutes after FSH application, peaks at ~10 minutes, remains above baseline for another ~10 minutes, and depends on extracellular  $Ca^{2+}$ . However, suppression of the FSH-induced  $Ca^{2+}$  increase by reducing extracellular  $Ca^{2+}$  does not inhibit FSH-induced phosphorylation of MAP kinase, estradiol production, or the acquisition of LH responsiveness. Like FSH, LH also increases  $Ca^{2+}$ , when applied to preovulatory follicles. At a physiological concentration (10 nM), LH elicits  $Ca^{2+}$  oscillations in a subset of cells in the outer mural granulosa layer. These oscillations continue for at least 6 hours and depend on the activity of  $G_q$  family G-proteins. Suppression of the oscillations by  $G_q$  inhibition does not inhibit meiotic resumption, but does slightly attenuate ovulation. In summary, both FSH and LH increase  $Ca^{2+}$  in the granulosa cells of intact follicles, but the functions of these  $Ca^{2+}$  rises are only starting to be identified.

## INTRODUCTION

20 In mammals, the G-protein coupled receptors for follicle stimulating hormone (FSH) and  
luteinizing hormone (LH) mediate events that lead to ovulation of fertilizable eggs. FSH  
receptors are expressed in granulosa cells of all follicles between the primary and preovulatory  
stages [1] and mediate the action of FSH to induce granulosa cell proliferation and  
differentiation, steroidogenesis, and LH receptor expression [2]. LH then acts on its receptors on  
25 the mural granulosa cells of preovulatory follicles, leading to oocyte maturation and ovulation  
[2,3].

Both FSH and LH stimulate the  $G_s$ /cAMP/protein kinase A (PKA) pathway [2], and  
pharmacological activation of this pathway is, with a few exceptions, sufficient to fully mimic  
30 responses to FSH [1,2,4] and LH [2,5-7]. Correspondingly, many of the FSH- and LH-stimulated  
responses are inhibited by inhibition of PKA [1,2], although non-specificity of some commonly  
used PKA inhibitors [8] leaves open the question of whether FSH and LH signaling through non-  
PKA pathways may also be important. In addition to stimulating cAMP production, FSH  
increases intracellular  $Ca^{2+}$  in isolated porcine granulosa cells [9,10], but not in a rat granulosa  
35 cell line [11]. LH signaling elevates  $Ca^{2+}$  in isolated porcine granulosa cells [12], and in  
luteinized human granulosa cells [13,14], although not in isolated mouse granulosa cells [15].

These reports raise questions about whether FSH and LH also elevate  $Ca^{2+}$  in other species,  
and in intact follicles, and what functions such  $Ca^{2+}$  rises might have in follicular development.  
40 Previous studies have suggested possible roles for  $Ca^{2+}$  in the FSH-stimulated MAP kinase  
activation that contributes to estrogen synthesis [16,17], and in LH-stimulated meiotic  
resumption [18,19]. We chose to investigate these questions using intact follicles, because  
although many granulosa cell signaling pathways are similar in isolated cells and in intact

follicles [2], some are not. For example, in intact follicles, LH causes a decrease in cyclic GMP  
45 to a few percent of the basal level [6,20], whereas in isolated granulosa cells, this decrease fails  
to occur [21] or occurs only partially [22]. Likewise, in intact ovaries, FSH and LH regulate levels  
of mRNA encoding C-type natriuretic peptide, but this regulation is lost in isolated granulosa  
cells [21].

50 Although AM-ester-based  $Ca^{2+}$  indicators have been useful for investigating  $Ca^{2+}$  dynamics in  
isolated granulosa cells [9,10,12] and isolated oocytes [23,24], their poor permeation into  
multilayer tissues precludes their use in isolated follicles. Mice expressing an early generation  
genetically encoded sensor, TN-XXL [25], had insufficient sensitivity to be useful (our  
unpublished results), but recently, mice expressing high-affinity optical sensors for  $Ca^{2+}$  have  
55 been developed [26,27]. Using mouse lines expressing the sensors Twitch-2B and GCaMP6s,  
we show that FSH and LH both elevate  $Ca^{2+}$  in the granulosa cells of intact follicles. We also  
begin to investigate the physiological functions of the FSH- and LH-induced  $Ca^{2+}$  rises.

## MATERIALS AND METHODS

60

### Mice

Mice globally expressing the Twitch-2B Ca<sup>2+</sup> sensor [28] were generated at Baylor College of Medicine, using CRISPR/CAS9 technology to target a Cre recombinase-responsive conditional Twitch-2B expression cassette containing the CAG promoter into the Rosa 26 locus.

65 CRISPR/CAS9 and donor sequences were delivered by pronuclear injection into fertilized donor oocytes and implanted into pseudopregnant females. The mice were authenticated by isolating DNA from the founder and from F1 pups, followed by PCR and Southern blot using primers spanning the 3' or 5' insert junctions. To generate globally expressing Twitch-2B mice, conditional mice were bred to a *Bact\_Cre* line to permanently delete the LoxP flanked stop  
70 cassette and establish a globally expressing sublineage. The mouse line was maintained on a C57BL/6J background.

Measurements were made using homozygotes expressing two copies of the Twitch-2B transgene or with heterozygotes expressing one copy. The concentration of Twitch-2B in the  
75 homozygote follicle cytoplasm was estimated to be ~20  $\mu$ M, based on western blotting (Supplementary Fig. S1A, see methods below), and an estimated cytoplasmic volume per follicle of 20 nl [29]. The mice had normal appearance and fertility, and follicle-enclosed oocytes from these mice showed a normal time course of nuclear envelope breakdown (NEBD) and ovulated in response to LH (Supplementary Fig. S1B), indicating that the sensor did not perturb  
80 physiological function.

Mice that express the GCaMP6s Ca<sup>2+</sup> sensor Cre-dependently by way of a floxed stop cassette [27] were obtained from The Jackson Laboratory (Bar Harbor, ME; stock number 024106;

B6;129S6/J strain). To induce global GCaMP6s expression, these mice were bred with *Hprt-Cre* mice [30] that were originally obtained from The Jackson Laboratory (stock number 004302), and that had been backcrossed onto a C57BL/6J background. The resulting line was maintained on a C57BL/6J background. Measurements were made using mice heterozygous for GCaMP6s. These mice had normal appearance and fertility.

90 Genotyping of both  $\text{Ca}^{2+}$  sensor lines was accomplished by observing the fluorescence of ears and tails using goggles fitted with FHS/EF-3GY1 emission filters (BLS Ltd, Budapest, Hungary). Heterozygotes and homozygotes were distinguished by PCR genotyping for the wildtype allele using primers listed in Supplementary Table S1.

95 Wildtype C57BL/6J mice were used for MAPK western blots, estradiol measurements, and measurements of nuclear envelope breakdown and ovulation. For most of these experiments, the wildtype mice were purchased from The Jackson Laboratory; a few wildtype mice were from the breeding colonies for the lines expressing  $\text{Ca}^{2+}$  sensors. All experiments with mice were performed at the University of Connecticut Health Center, and all animal protocols were  
100 approved by the University of Connecticut Health Center Animal Care Committee.

### Isolation and culture of follicles

Follicles of the indicated sizes were dissected from prepubertal (24-27 day old) mice, and cultured on Millicell organotypic membranes (Merck Millipore, Cork, Ireland; PICMORG50) in  
105 MEM $\alpha$  medium (12000-022, Invitrogen) with 25 mM  $\text{NaHCO}_3$ , 75  $\mu\text{g/ml}$  penicillin G, 50  $\mu\text{g/ml}$  streptomycin, a mixture of 5  $\mu\text{g/ml}$  insulin, 5  $\mu\text{g/ml}$  transferrin, and 5 ng/ml selenium (Sigma-Aldrich, St. Louis, MO, #11884), and 3 mg/ml bovine serum albumin (MP Biomedicals, #103700). Where indicated, 1 nM FSH was included in the medium. To reduce  $\text{Ca}^{2+}$  in the

medium, EGTA was added, and the resulting free  $\text{Ca}^{2+}$  concentrations were calculated using  
110 MaxChelator (<http://maxchelator.stanford.edu/CaEGTA-TS.htm>; [31]).

Follicles were used for experiments 24-30 hours after isolation. Highly purified ovine FSH  
(AFP7558C) and ovine LH (oLH-26) were obtained from A.F. Parlow (National Hormone and  
Peptide Program, Torrance, CA). The follicles, which were spheres when dissected, flattened to  
115 disks after culture on the Millicell membrane, thus facilitating imaging. Diameters described in  
the text refer to measurements at the time of dissection. For determining meiotic resumption in  
response to LH, follicle-enclosed oocytes were checked hourly for the loss of the nucleolus and  
nuclear envelope.

## 120 **Confocal Imaging**

For confocal microscopy, follicles were placed in a 100  $\mu\text{l}$  drop of medium in the channel of a “ $\mu$ -  
slide” that connects two ports (ibidi GmbH, Martinsried, Germany, product #80176 custom  
ordered without adhesive; see [6]). Slides with a channel height of 100  $\mu\text{m}$  (ibidi custom order)  
were used for follicles 140-250  $\mu\text{m}$  in diameter; 290-360  $\mu\text{m}$  follicles were placed in a 200  $\mu\text{m}$ -  
125 deep slide. A thin layer of silicone grease was applied to the outer edge of the slide and a glass  
coverslip (ibidi # 10812) was placed on the silicone to gently immobilize the follicle in the  
channel. FSH, LH, or control medium was applied by perfusing 200  $\mu\text{l}$  of the solution through  
the channel by way of the ports. For recordings at 1-6 hours after LH treatment, LH was applied  
to the follicles on Millicell membranes; just before imaging, follicles were transferred to a  $\mu$ -slide  
130 in medium containing LH.

Follicles were imaged on a Zeiss LSM 5 Pascal confocal microscope using a C-Apochromat  
40X/1.2 numerical aperture objective with Immersol W immersion medium (Carl Zeiss



Microscopy). Twitch-2B CFP was excited using a 440 nm laser (Toptica Photonics, Victor, NY) using a power range of 1-5%. The dichroic (510DLCP) and CFP and YFP emission filters (HQ480/40M and HQ535/50M, respectively) were from Chroma Technology (Rockingham, VT). GCaMP6s was imaged using a 488 nm laser and an HQ525/50M emission filter. A warm air blower (Nevtek ASI-400, Burnsville, VA) was used to maintain a stage temperature of 32-35 °C. For Twitch-2B, the pinhole was fully open (13  $\mu\text{m}$  optical section); for GCaMP6s recordings, a 5  $\mu\text{m}$  optical section was used. 12-bit scans at 512 x 512 resolution were collected every 10 seconds for up to 50 minutes. Background correction was applied by subtracting the averaged autofluorescence of 3-5 wildtype follicles imaged under identical conditions. Because ~28% of the light collected by the YFP emission filter is actually emitted by CFP, we subtracted 28% of the background-subtracted YFP intensity before calculating the CFP/YFP ratio.

145

### **RNA sequencing data analysis**

Transcriptome data of mural granulosa cells from 2-month-old C57BL/6J mice [32] in FASTQ format were downloaded from the European Nucleotide Archive (ENA; <https://www.ebi.ac.uk/ena>). Sequence alignments were performed using the RNA STAR tool [33] within the Galaxy platform [34]. Reads were aligned to the mouse reference genome (GRCm38, a.k.a. mm10). Gene model for splice junctions, in GTF file format, was obtained from ENSEMBL ftp site (release 92). The GTF file was filtered to contain only entries with the “gene\_biotype” value set to “protein\_coding” in the “attributes” field. To calculate gene expression, we counted the numbers of reads aligned to exons using featureCounts [35] version 1.6.0.6 from within the Galaxy platform, with the value of “minimum bases of overlap” set to 30. To account for the depth of sequencing among datasets, we normalized count expression data to counts per million (CPM) [36] by using the formula  $CPM_i = 10^6 \times C_i / T_a$ , where  $CPM_i$  is the CPM value for the gene  $i$ ,  $C_i$  is the number of counts reported by featureCounts, and  $T_a$  is the

155

total number of reads in the sample aligned to the genome. To identify all genes encoding  $\text{Ca}^{2+}$   
160 channels, gene symbols for all mouse genes annotated to “GO:0015085: calcium ion  
transmembrane transporter activity” were downloaded from Mouse Genome Informatics [37]  
(130 genes, downloaded on 09/05/2018). This list was edited to include only those genes  
encoding plasma membrane proteins that transport  $\text{Ca}^{2+}$ . Calcium channels in organelles,  $\text{Ca}^{2+}$   
channel regulatory proteins, and TRP channels that are not significantly permeable to  $\text{Ca}^{2+}$  [38]  
165 were removed from the list.

### Western blotting

Western blots for quantifying the Twitch-2B concentration were probed with a primary antibody  
against GFP (Cell Signaling Technology, Beverly, MA; #2555); this antibody also recognizes  
170 CFP and YFP. The Epac2-camps protein that was used as a standard for these blots has a  
similar CFP and YFP-containing structure as Twitch-2B, and >90% purity [39]. Western blots for  
detecting MAP kinase phosphorylation were probed with primary antibodies against phospho-  
MAPK1/3 (Thr202/Tyr204) and total MAPK1/3 (Cell Signaling Technology, #4370 and #4696,  
respectively). MAPK1 is also known as ERK2 or p42MAPK, and MAPK3 is also known as ERK1  
175 or p44MAPK. The antibody used to detect PDE1A was from Proteintech (Rosemont, IL,  
#12442-2-AP). For all western blots except Fig. S4, antibody binding was detected using  
fluorescent secondary antibodies (LI-COR Biosciences, Lincoln, NE; IRDye800CW and  
IRDye680RD) and a LICOR Odyssey imaging system. The secondary antibody for Fig. S4 was  
conjugated to horseradish peroxidase (Santa Cruz Biotechnology, Dallas, TX) and detected with  
180 ECL Prime (GE Healthcare, Chicago, IL) and a CCD camera (G:BOX Chemi XT4, Syngene,  
Frederick, MD). Further antibody details are included in Supplementary Table S2. Signal  
intensities were measured using ImageJ (<https://imagej.nih.gov/ij/>).

### **Sources of reagents**

185 YM-254890 was obtained from Wako Chemicals (Richmond, VA). EGTA, cadmium chloride, nickel chloride, and nifedipine were from Sigma-Aldrich. ELISA kits for measurement of 17 $\beta$ -estradiol were from Cayman Chemical (Ann Arbor, MI).

## RESULTS AND DISCUSSION

190

### **Measurement of an FSH-induced increase in $\text{Ca}^{2+}$ in the granulosa cells of intact ovarian follicles expressing the Twitch-2B FRET sensor.**

Using Twitch-2B-expressing follicles ranging in diameter from  $\sim 140 \mu\text{m}$  (preantral) to  $\sim 320 \mu\text{m}$  (fully grown antral), we measured  $\text{Ca}^{2+}$  levels before and after addition of FSH. The follicles  
195 were imaged by confocal microscopy, with the focus on the oocyte equator (Fig. 1A). Twitch-2B fluorescence was seen in the granulosa cells and in the residual theca/blood vessel layer surrounding the follicle, but was too low to be useful for measurements in the oocyte. In some of the smaller follicles, the fluorescence was uniform throughout the granulosa cells (Fig. 1A), although in others, it was dimmer in the interior granulosa layers. In larger follicles, the  
200 fluorescence was consistently dimmer in the interior layers (see Fig. 4A). For this reason, measurements were made from the outer  $25 \mu\text{m}$  region of granulosa cells.

Binding of  $\text{Ca}^{2+}$  to Twitch-2B increases FRET between CFP and YFP, such that an increase in the YFP/CFP emission ratio measured after CFP excitation indicates an increase in free  $\text{Ca}^{2+}$ ;  
205 the  $\text{EC}_{50}$  of Twitch-2B is  $\sim 200 \text{ nM}$  [28]. In response to perfusion of  $1 \text{ nM}$  FSH, YFP emission in the granulosa cells increased and CFP emission decreased (Fig. 1B,C), indicating an increase in  $\text{Ca}^{2+}$ . The  $\text{Ca}^{2+}$  rise began several minutes after FSH application.  $\text{Ca}^{2+}$  levels reached a peak at about 10 minutes after the initial FSH exposure, and remained above baseline for at least another 10 minutes.

210

### **The FSH-induced $\text{Ca}^{2+}$ increase occurs at a physiological concentration of FSH, in follicles of different sizes, and independently of Twitch-2B concentration.**

In Twitch-2B-expressing follicles, a concentration of  $1 \text{ nM}$  FSH was sufficient to elevate  $\text{Ca}^{2+}$  to

almost a maximal level, while no rise in  $\text{Ca}^{2+}$  was seen with 0.1 nM FSH (Fig. 1D). Follicles of all  
215 size classes tested responded similarly to 1 nM FSH (Fig. 1E). The 1 nM concentration of FSH  
required to stimulate a rise in  $\text{Ca}^{2+}$  correlates well with the concentration of FSH needed to  
optimally stimulate follicular development in our culture system. In this system, 0.3 nM FSH  
causes ~80% of follicles to acquire the ability to resume meiosis in response to LH, whereas 1  
nM FSH causes 100% of follicles to become LH responsive [7]. During the reproductive cycle,  
220 FSH concentrations reach a peak of ~1 nM in mouse serum [40]. Thus, the concentration of  
FSH that we find to be required to elevate  $\text{Ca}^{2+}$  in the granulosa cells of isolated follicles is in a  
physiologically relevant range.

Expression of the Twitch-2B sensor could conceivably buffer cytosolic  $\text{Ca}^{2+}$ , reducing the signal  
225 amplitude. We assessed this possibility by comparing mice heterozygous or homozygous for  
Twitch-2B. CFP fluorescence was about two-fold higher in homozygous follicles (Supplementary  
Fig. S2A), reflective of Twitch-2B protein expression levels. However, the baseline YFP/CFP  
ratio and the peak ratio in response to FSH were not different between heterozygous and  
homozygous follicles (Supplementary Fig. S2B), indicating that Twitch-2B expression did not  
230 alter basal  $\text{Ca}^{2+}$  levels or attenuate the FSH-induced  $\text{Ca}^{2+}$  increase. Thus the ~20  $\mu\text{M}$  cytosolic  
concentration of the Twitch-2B sensor (see Materials and Methods) is not a significant buffer,  
consistent with previous determinations that ~100  $\mu\text{M}$  of the  $\text{Ca}^{2+}$  buffer BAPTA is required to  
blunt  $\text{Ca}^{2+}$  rises in other cells [41,42].

235 **The FSH-induced  $\text{Ca}^{2+}$  increase occurs uniformly throughout the outer granulosa cell  
region, as detected in follicles expressing the GCaMP6s sensor.**

To test whether  $\text{Ca}^{2+}$  increases uniformly in different cells within the outer granulosa layer, we  
imaged the  $\text{Ca}^{2+}$  increase using follicles from mice expressing the GCaMP6s sensor [27], which

shows increased fluorescence when  $\text{Ca}^{2+}$  is bound; the  $\text{EC}_{50}$  for GCaMP6s is  $\sim 140$  nM [43].

240 GCaMP6s is not a ratiometric indicator, so is less useful for comparing different follicles, but it has the advantage of allowing direct visualization of the spatial distribution of  $\text{Ca}^{2+}$  within a single follicle. As seen with Twitch-2B, GCaMP6s fluorescence was fairly uniform in the granulosa cells of smaller follicles, although undetectable in the oocyte (Fig. 2A), but was restricted to the outer mural granulosa cells in larger follicles (see Figs 5A and 6A below).

245 Following perfusion with 1 nM FSH,  $\text{Ca}^{2+}$  increased uniformly throughout the outer granulosa cell layer, and most individual cells had similar  $\text{Ca}^{2+}$  dynamics (Fig. 2A,B and supplementary movie 1). The kinetics of the  $\text{Ca}^{2+}$  increase and subsequent decrease were similar to those observed with Twitch-2B (compare Figs 1C and 2B).

250 **The FSH-induced  $\text{Ca}^{2+}$  increase is due to influx from the extracellular solution.**

To investigate if the FSH-induced  $\text{Ca}^{2+}$  increase is due to  $\text{Ca}^{2+}$  influx from the extracellular solution, we added 2.0 mM EGTA to the medium, which contained 1.8 mM  $\text{CaCl}_2$ , thus lowering extracellular free  $\text{Ca}^{2+}$  to  $\sim 0.002$  mM (see Materials and Methods). After 20 minutes, we

255 perfused FSH onto the follicle while measuring the Twitch-2B signal. Under these conditions, FSH did not cause a detectable increase in  $\text{Ca}^{2+}$  in the granulosa cells (Fig. 3A,B). Likewise, when 1.6 mM EGTA was added to the medium, to reduce extracellular  $\text{Ca}^{2+}$  to 0.2 mM, FSH did not cause a detectable  $\text{Ca}^{2+}$  increase (Fig. 3A,B). These results indicate that the FSH-induced  $\text{Ca}^{2+}$  increase results from  $\text{Ca}^{2+}$  influx from the extracellular solution. Consistent with this

260 conclusion, exposure to 10  $\mu\text{M}$  YM-254890, which inhibits signaling by the  $\text{G}_q$ -family G-proteins [44,45; see Figs 4E and 6A,B below] and thus inhibits  $\text{Ca}^{2+}$  release from the endoplasmic reticulum, did not prevent the  $\text{Ca}^{2+}$  rise in response to FSH (Fig. 3A,B).

To identify candidate ion channels potentially mediating the FSH-induced  $\text{Ca}^{2+}$  influx, we  
265 analyzed gene expression data from next generation sequencing of mouse mural granulosa cell  
mRNA [32] (Supplementary Table S3). Among the genes encoding plasma membrane  $\text{Ca}^{2+}$   
permeable channels, the most highly expressed was *Trpm7*, followed by 2 voltage-gated  $\text{Ca}^{2+}$   
channels: *Cacna1h* (T type) and *Cacna1a* (P/Q type). Other plasma membrane  $\text{Ca}^{2+}$  permeable  
channels, including a voltage-gated L type channel, a glutamate receptor, a purinergic receptor,  
270 and pannexin 1 were expressed at somewhat lower levels. In an attempt to inhibit some of  
these channels, we tested several voltage-sensitive  $\text{Ca}^{2+}$  channel blockers,  $\text{Cd}^{2+}$ ,  $\text{Ni}^{2+}$ , and  
nifedipine [46]. At the concentrations tested, none inhibited the FSH-induced  $\text{Ca}^{2+}$  increase  
(Supplementary Fig. S3), which is not surprising because multiple channel types were detected  
in RNAseq transcriptome data of mural granulosa cells (Supplementary Table S3), likely  
275 obscuring suppression of  $\text{Ca}^{2+}$  influx. Unfortunately, specific inhibitors of TRPM7 are not  
currently available [47].

### **The function of the FSH-induced $\text{Ca}^{2+}$ increase is unknown.**

Previous studies of isolated rat granulosa cells have indicated that FSH-induced  
280 phosphorylation of the mitogen-activated protein kinases MAPK1 and MAPK3 depends on  
extracellular  $\text{Ca}^{2+}$  [16]. MAPK1/3 phosphorylation is of particular interest because it is essential  
for the FSH-induced increase in synthesis of aromatase, which catalyzes the synthesis of  
estradiol [17]. Therefore, we investigated the effect of reducing extracellular  $\text{Ca}^{2+}$  on the FSH-  
induced phosphorylation of MAPK1/3 and synthesis of estradiol in mouse follicles. However,  
285 suppression of the FSH-induced  $\text{Ca}^{2+}$  rise by addition of 1.6 mM EGTA to the medium did not  
inhibit FSH-induced MAPK1/3 phosphorylation (Fig. 3C) or estradiol synthesis (Fig. 3D). It also  
did not prevent the FSH-induced acquisition of the ability to resume meiosis in response to LH  
(Fig. 3E). Our findings indicate that the FSH-induced  $\text{Ca}^{2+}$  rise is not required for several

biological functions. Whether the  $\text{Ca}^{2+}$  rise is part of a back-up system for these functions, or  
290 whether it regulates other functions such as FSH-induced granulosa cell proliferation or  
suppression of apoptosis, remains to be investigated.

**LH causes persistent  $\text{Ca}^{2+}$  oscillations in the granulosa cells of intact ovarian follicles.**

To investigate whether LH increases  $\text{Ca}^{2+}$  in the granulosa cells of intact follicles, we isolated  
295 follicles with diameters of 290-360  $\mu\text{m}$ , and cultured them for 24-30 hours in the presence of 1  
nM FSH to induce expression of LH receptors. In follicles expressing Twitch-2B, the  
fluorescence signal was strong in the outer mural granulosa cells, but in the inner mural  
granulosa cells, cumulus cells, and oocyte, the signal was too weak to be useful (Fig. 4A).  
Therefore, measurements were made from the outer 25  $\mu\text{m}$  layer of granulosa cells.

300  
Perfusion of 10 nM LH caused a barely detectable  $\text{Ca}^{2+}$  increase, as indicated by a small  
increase in the YFP/CFP emission ratio of Twitch-2B (Fig. 4B,C,D). In response to subsequent  
perfusion of 300 nM LH,  $\text{Ca}^{2+}$  began to increase immediately, reached a peak at about 5  
minutes, and remained above baseline for at least another 5 minutes (Fig. 4B,C,D). The peak  
305 concentration of LH attained during the mouse reproductive cycle is about 1 nM [48,49], but 10  
nM is the minimum concentration of ovine LH needed to cause meiotic resumption in all follicles  
under our experimental conditions [7], perhaps related to use of LH from a different species.

We next tested whether the  $\text{Ca}^{2+}$  elevation in response to 10 nM LH might be more evident  
310 using GCaMP6s, which has an  $\text{EC}_{50}$  of  $\sim 140$  nM vs  $\sim 200$  nM for Twitch-2B. GCaMP6s is also  
more sensitive because  $\text{Ca}^{2+}$  causes a proportionately larger change in fluorescence intensity  
than that seen with Twitch-2B (compare Figs 1B and 2B, and Figs 4B and 5B below). When a  
follicle expressing GCaMP6s was exposed to 10 nM LH, some individual cells in the outermost



315 mural granulosa layer showed oscillating rises in  $\text{Ca}^{2+}$ , beginning within a minute after perfusion and occurring once or twice per minute throughout the 10 minute recording period (Fig. 5A,B; supplementary movies S2 and S3). During each oscillation,  $\text{Ca}^{2+}$  remained above baseline for ~10-30 seconds. When the follicle was subsequently perfused with 300 nM LH,  $\text{Ca}^{2+}$  elevation occurred throughout the 25  $\mu\text{m}$  outer region of the mural granulosa cells (Fig. 5A,B).

320 To investigate how long the  $\text{Ca}^{2+}$  oscillations in response to LH continued, we applied 10 nM LH to GCaMP6s-expressing follicles on a Millicell membrane, and then 1, 2, 4, or 6 hours later, transferred them to an imaging chamber.  $\text{Ca}^{2+}$  oscillations occurred for at least 6 hours after LH application (Fig. 5C; Supplementary Movies S4 and S5), though the amplitude relative to the baseline appeared to be reduced when compared to oscillations immediately after LH (see Fig. 325 5B).

#### **The LH-induced $\text{Ca}^{2+}$ increases require the activity of a $\text{G}_q$ -family G-protein.**

The  $\text{Ca}^{2+}$  rises elicited in response to LH were blocked by 10  $\mu\text{M}$  of the  $\text{G}_q$ -family G-protein inhibitor YM-254890 (Figs 4E and 6A,B; supplementary movie S6). 10  $\mu\text{M}$  YM-254890 inhibits 330 signaling by  $\text{G}_q$ -family G-proteins ( $\text{G}_q$ ,  $\text{G}_{11}$ , and  $\text{G}_{14}$ ), but not by other G-proteins ( $\text{G}_s$ ,  $\text{G}_i$ ,  $\text{G}_o$ ,  $\text{G}_{13}$ ), or by voltage-gated or ATP-gated  $\text{Ca}^{2+}$  channels [44,45]. These data indicate that, unlike the FSH-induced  $\text{Ca}^{2+}$  rise, the LH-induced  $\text{Ca}^{2+}$  oscillations are most likely initiated by  $\text{IP}_3$ -induced  $\text{Ca}^{2+}$  release from the endoplasmic reticulum. Consistently, previous studies have shown that LH induces  $\text{IP}_3$  production in isolated granulosa cells of rat [22] and mouse [50].

335

#### **Inhibition of $\text{G}_q$ -family G-proteins does not inhibit LH-induced meiotic resumption, but**

**does slightly attenuate ovulation.**

Previous studies have suggested that an LH-induced  $\text{Ca}^{2+}$  rise in the granulosa cells might  
340 contribute to causing meiotic resumption [18,19]. However, inhibition of the LH-induced  $\text{Ca}^{2+}$   
oscillations with the  $G_q$ -family inhibitor YM-254890 did not inhibit or delay meiotic resumption in  
mouse follicle-enclosed oocytes (Fig. 6C). This result confirms a previous finding that  $G_q$  family  
G-proteins are not required for meiotic resumption (50). However, since the  $\text{Ca}^{2+}$ -activated  
cGMP phosphodiesterase PDE1 is expressed in mouse granulosa cells (Egbert et al., 2016,  
345 and Supplementary Fig. S4), the LH-induced  $\text{Ca}^{2+}$  rise would increase cGMP  
phosphodiesterase activity, and thus would contribute to decreasing cGMP. Therefore, while the  
 $\text{Ca}^{2+}$  rise is not required for LH-induced meiotic resumption, it could be a component of a  
"failsafe" system that ensures that LH signaling lowers cGMP such that meiosis proceeds.

350 Consistent with a previous study (50), YM-254890 caused some decrease in the number of  
follicles that ovulated in response to LH (Fig. 6D). The average reduction of ~15% seen with  
YM-254890 is less than the ~50% reduction seen in mice in which  $G_{q/11}$  expression was  
inactivated (50), perhaps due to a difference between acute inhibition of  $G_q$ -family G-proteins  
and chronic lack of  $G_{q/11}$  due to deletion during follicle development. Thus, the LH-induced  $\text{Ca}^{2+}$   
355 oscillations may signal together with cAMP to stimulate ovulation. Whether the  $\text{Ca}^{2+}$  elevations  
serve other functions as well remains to be investigated.

## **ACKNOWLEDGEMENTS**

We thank Rachael Norris and Leia Shuhaibar for their participation in initiating this project using earlier Ca<sup>2+</sup> measurement methods, Siu-Pok Yee and Deborah Kaback for their expertise and advice on mouse genome modification and colony maintenance, and Tracy Uliasz, Giulia Vigone, Mary Hunzicker-Dunn, and Aylin Hanyaloglu for useful discussions. The Tolias lab thanks Zheng Huan Tan for colony management.

## REFERENCES

- [1] Hardy K, Fenwick M, Mora J, Laird M, Thomson K, Franks S. Onset and heterogeneity of responsiveness to FSH in mouse preantral follicles in culture. *Endocrinology* 2017; 158:134-147.
- [2] Hunzicker-Dunn M, Mayo K. Gonadotropin signaling in the ovary. In Knobil and Neill's *Physiology of Reproduction*, 4th Edition. T.M. Plant, and A.J. Zeleznik, editors. Academic Press/San Diego, 2015; pp. 895-945.
- [3] Jaffe LA, Egbert JR. Regulation of mammalian oocyte meiosis by intercellular communication within the ovarian follicle. *Ann Rev Physiol* 2017; 79:237-260.
- [4] Puri P, Little-Ihrig L, Chandran U, Law NC, Hunzicker-Dunn M, Zeleznik AJ. Protein kinase A: a master kinase of granulosa cell differentiation. *Scientific Reports* 2016; 6:28132.
- [5] Reizel Y, Elbaz J, Dekel N. Sustained activity of the EGF receptor is an absolute requisite for LH-induced oocyte maturation and cumulus expansion. *Mol Endocrinol* 2010; 24:402-411.
- [6] Shuhaibar LC, Egbert JR, Norris RP, Lampe PD, Nikolaev VO, Thunemann M, Wen L, Feil R, Jaffe LA. Intercellular signaling via cyclic GMP diffusion through gap junctions in the mouse ovarian follicle. *Proc Natl Acad Sci USA* 2015; 112:5527-5532.
- [7] Vigone G, Shuhaibar LC, Egbert JR, Uliasz TF, Movsesian MA, Jaffe LA. Multiple cAMP phosphodiesterases act together to prevent premature oocyte meiosis and ovulation. *Endocrinology* 2018; 159:2142-2152.
- [8] Davies SP, Reddy H, Caivano M, Cohen P. Specificity and mechanism of action of some commonly used protein kinase inhibitors. *Biochem J* 2000; 351:95-105.
- [9] Flores JA, Veldhuis JD, Leong DA. Follicle-stimulating hormone evokes an increase in intracellular free calcium ion concentrations in single ovarian (granulosa) cells. *Endocrinology* 1990; 127:3172-3179.

- [10] Flores JA, Leong DA, Veldhuis JD. Is the calcium signal induced by follicle-stimulating hormone in swine granulosa cells mediated by adenosine cyclic 3', 5'-monophosphate-dependent protein kinase? *Endocrinology* 1992; 130:1862-1866.
- [11] Grieshaber NA, Boitano S, Ji I, Mather JP, Ji TH. Differentiation of granulosa cell line: Follicle-stimulating hormone induces formation of lamellipodia and filopodia via the adenylyl cyclase/cyclic adenosine monophosphate signal. *Endocrinology* 2000; 141:3461-3470.
- [12] Flores JA, Aguirre C, Sharma OP, Veldhuis JD. Luteinizing hormone (LH) stimulates both intracellular calcium ion ( $[Ca^{2+}]_i$ ) mobilization and transmembrane cation influx in single ovarian (granulosa) cells: Recruitment as a cellular mechanism of LH- $[Ca^{2+}]_i$  dose response. *Endocrinology* 1998; 139:3606-3612.
- [13] Lee PSN, Buchan AMJ, Hsueh AJW, Yuen BH, Leung PCK. Intracellular calcium mobilization in response to the activation of human wild-type and chimeric gonadotropin receptors. *Endocrinology* 2002; 143:1732-1740.
- [14] Jonas KC, Chen S, Virta M, Mora J, Franks S, Huhtaniemi I, Hanyaloglu AC. Temporal reprogramming of calcium signaling via crosstalk of gonadotropin receptors that associate as functionally asymmetric heteromers. *Scientific Reports* 2018; 8:2239.
- [15] Webb RJ, Bains H, Cruttwell C, Carroll J. Gap-junctional communication in mouse cumulus-oocyte complexes: implications for the mechanism of meiotic maturation. *Reproduction* 2002; 123:41-52.
- [16] Cottom J, Salvador LM, Maizels ET, Reierstad S, Park Y, Carr DW, Davare MA, Hell JW, Palmer SS, Dent P, Kawakatsu H, Ogata M, Hunzicker-Dunn M. Follicle-stimulating hormone activates extracellular signal-regulated kinase but not extracellular signal-regulated kinase kinase through a 100-kDa phosphotyrosine phosphatase. *J Biol Chem* 2003; 278:7167-7179.

- [17] Donabauer EM, Hunzicker-Dunn ME. Extracellular signal-regulated kinase (ERK)-dependent phosphorylation of Y-box-binding protein 1 (YB-1) enhances gene expression in granulosa cells in response to follicle-stimulating hormone (FSH). *J Biol Chem* 2016; 291:12145-12160.
- [18] Goren S, Oron Y, Dekel N. Rat oocyte maturation: role of calcium in hormone action. *Mol Cell Endocrinol* 1990; 72:131-138.
- [19] Egbert JR, Uliasz TF, Shuhaibar LC, Geerts A, Wunder F, Kleiman RJ, Humphrey JM, Lampe PD, Artemyev NO, Rybalkin SD, Beavo JA, Movsesian MA, Jaffe LA. Luteinizing hormone causes phosphorylation and activation of the cyclic GMP phosphodiesterase PDE5 in rat ovarian follicles, contributing, together with PDE1 activity, to the resumption of meiosis. *Biol Reprod* 2016; 94(5):110,1-11.
- [20] Egbert JR, Shuhaibar LC, Edmund AB, Van Helden DA, Robinson JW, Uliasz TF, Baena V, Geerts A, Wunder F, Potter LR, Jaffe LA. Dephosphorylation and inactivation of the NPR2 guanylyl cyclase in the granulosa cells contributes to the LH-induced cGMP decrease that causes resumption of meiosis in rat oocytes. *Development* 2014; 141:3594-3604.
- [21] Lee K-B, Zhang M, Sugiura K, Wigglesworth K, Uliasz T, Jaffe LA, Eppig JJ. Hormonal coordination of natriuretic peptide type C and natriuretic peptide receptor 3 expression in mouse granulosa cells. *Biol Reprod* 2013; 88:1-9.
- [22] Davis JS, Weakland LL, West LA, Farese RV. Luteinizing hormone stimulates the formation of inositol trisphosphate and cyclic AMP in rat granulosa cells. *Biochem J* 1986; 238:597-604.
- [23] Cheon B, Lee H-C, Wakai T, Fissore RA.  $Ca^{2+}$  influx and the store-operated  $Ca^{2+}$  entry pathway undergo regulation during mouse oocyte maturation. *Mol Biol Cell* 2013; 24:1396-1410.

- [24] Carvacho I, Ardestani G, Lee HC, McGarvey K, Fissore RA, Lykke-Hartmann K. TRPM7-like channels are functionally expressed in oocytes and modulate post-fertilization embryo development in mouse. *Scientific Reports* 2016; 6:34236.
- [25] Mank M, Santos AF, Direnberger S, Mrcsic-Flogel TD, Hofer SB, Stein V, Hendel T, Reiff DF, Levelt C, Borst A, Bonhoeffer T, Hübener M, Griesbeck O. A genetically encoded calcium indicator for chronic in vivo two-photon imaging. *Nature Methods* 2008; 15:805-811.
- [26] Direnberger S, Mues M, Micale V, Wotjak CT, Dietzel S, Schubert M, Scharr A, Hassan S, Wahl-Schott C, Biel M, Krishnamoorthy G, Griesbeck O. Biocompatibility of a genetically encoded calcium indicator in a transgenic mouse model. *Nature Communications* 2012; 3:1031.
- [27] Madisen L, Garner AR, Shimaoka D, Chuong AS, Klapoetke NC, Li L, van der Bourg A, Niino Y, Egolf L, Monetti C, Gu H, Mills M, Cheng A, Tasic B, Nguyen TN, Sunkin SM, Benucci A, Nagy A, Miyawaki A, Helmchen F, Empson RM, Knöpfel T, Boyden ES, Reid RC, Carandini M, Zeng H. Transgenic mice for intersectional targeting of neural sensors and effectors with high specificity and performance. *Neuron* 2015; 85:942-958.
- [28] Thestrup T, Litzlbauer J, Bartholomäus I, Mues M, Russo L, Dana H, Kovalchuk Y, Liang Y, Kalamakis G, Laukat Y, Becker S, Witte G, Geiger A, Allen T, Rome LC, Chen T-W, Kim DS, Garaschuk O, Griesinger C, Griesbeck O. Optimized ratiometric calcium sensors for functional *in vivo* imaging of neurons and T lymphocytes. *Nature Methods* 2014; 11:175-182.
- [29] Norris RP, Freudzon M, Nikolaev VO, Jaffe LA. Epidermal growth factor receptor kinase activity is required for gap junction closure and for part of the decrease in ovarian follicle cGMP in response to LH. *Reproduction* 2010; 140:655-662.
- [30] Tang S-HE, Silva FJ, Tsark WMK, Mann JR. A Cre/loxP-deleter transgenic line in mouse strain 129S1/SvImJ. *Genesis* 2002; 32:199-202.

- [31] Bers DM, Patton CW, Nuccitelli R. A practical guide to the preparation of Ca<sup>2+</sup> buffers. *Meth Cell Biol* 2010; 99:1-26.
- [32] Kawasaki K, Sumitomo J, Shiroguchi K, Endo TA, Sugiura K. (2016). Assessing transcriptomes of mouse cumulus cells, mural granulosa cells, and cumulus-oocyte complexes. <https://www.ncbi.nlm.nih.gov/geo/query/acc.cgi?acc=GSE80326>.
- [33] Dobin A, Davis CA, Schlesinger F, Drenkow J, Zaleski C, Jha S, Batut P, Chaisson M, Gingeras TR. STAR: Ultrafast universal RNA-seq aligner. *Bioinformatics* 2013; 29:15-21.
- [34] Goecks J, Nekrutenko A, Taylor J, Galaxy Team. Galaxy: A comprehensive approach for supporting accessible, reproducible, and transparent computational research in the life sciences. *Genome Biol* 2010; 11:R86.
- [35] Liao Y, Smyth GK, Shi W. Featurecounts: An efficient general purpose program for assigning sequence reads to genomic features. *Bioinformatics* 2014; 30: 923-930.
- [36] Mortazavi A, Williams BA, McCue K, Schaeffer L, Wold B. Mapping and quantifying mammalian transcriptomes by RNA-seq. *Nature Methods* 2008; 5:621.
- [37] Smith CL, Blake JA, Kadin AJ, Richardson JE, Bult CJ. Mouse Genome Database (MGD)-2018: knowledgebase for the laboratory mouse. *Nucleic Acids Res* 2018; 46:D836-D842.
- [38] Mulier M, Vriens J, Voets T. TRP channel pores and local calcium signals. *Cell Calcium* 2017; 66:19-24.
- [39] Nikolaev VO, Bunemann M, Hein L, Hannawacker A, Lohse MJ. Novel single chain cAMP sensors for receptor-induced signal propagation. *J Biol Chem* 2004; 279:37215-37218.
- [40] Visser JA, Durlinger ALL, Peters IJJ, van den Heuvel ER, Rose UM, Kramer P, de Jong FH, Themmen APN. Increased oocyte degeneration and follicular atresia during the estrous cycle in anti-Müllerian hormone null mice. *Endocrinology* 2007; 148:2301-2308.



- [41] Kline D. Calcium-dependent events at fertilization of the frog egg: injection of a calcium buffer blocks ion channel opening, exocytosis, and formation of pronuclei. *Dev Biol* 1988; 126:346-361.
- [42] Rozov A, Burnashev N, Sakmann B, Neher E. Transmitter release modulation by intracellular  $\text{Ca}^{2+}$  buffers in facilitating and depressing nerve terminals of pyramidal cells in layer 2/3 of the rat neocortex indicates a target cell-specific difference in presynaptic calcium dynamics. *J Physiol* 2001; 531:807-826.
- [43] Chen TW, Wardill TJ, Sun Y, Pulver SR, Renninger SL, Baohan A, Schreiter ER, Kerr RA, Orger MB, Jayaraman V, Looger LL, Svoboda K, Kim DS. Ultrasensitive fluorescent proteins for imaging neuronal activity. *Nature* 2013; 499:295-300.
- [44] Takasaki J, Saito T, Taniguchi M, Kawasaki T, Moritani Y, Hayashi K, Kobori M. A Novel  $\text{G}\alpha_{q/11}$ -selective inhibitor. *J Biol Chem* 2004; 279:47438-47445.
- [45] Nishimura A, Kitano K, Takasaki J, Taniguchi M, Mizuno N, Tago K, Hakoshima T, Itoh H. Structural basis for the specific inhibition of heterotrimeric  $\text{G}_q$  protein by a small molecule. *PNAS* 2010; 107:13666-13671.
- [46] Catterall WA, Perez-Reyes E, Snutch TP, Striessnig J. International Union of Pharmacology. XLVIII. Nomenclature and structure-function relationships of voltage-gated calcium channels. *Pharmacol Rev* 2005; 57:411-425.
- [47] Chubanov V, Ferioli S, Gudermann T. Assessment of TRPM7 functions by drug-like small molecules. *Cell Calcium* 2017; 67:166-173.
- [48] Rodriguez KF, Couse JF, Jayes FL, Hamilton KJ, Burns KA, Taniguchi F, Korach KS. Insufficient luteinizing hormone-induced intracellular signaling disrupts ovulation in preovulatory follicles lacking estrogen receptor- $\beta$ . *Endocrinology* 2010; 151:2826–2834.

[49] Czieselsky K, Prescott M, Porteous R, Campos P, Clarkson J, Steyn FJ, Campbell RE, Herbison AE. Pulse and surge profiles of luteinizing hormone secretion in the mouse. *Endocrinology* 2016; 157:4794–4802.

[50] Breen SM, Andric N, Ping T, Xie F, Offermans S, Gossen JA, Ascoli M. Ovulation involves the luteinizing hormone-dependent activation of  $G_{q/11}$  in granulosa cells. *Mol Endocrinol* 2013; 27:1483-1491.

## FIGURE LEGENDS

**Figure 1.** FSH increases intracellular  $\text{Ca}^{2+}$  in the mural granulosa cells of intact follicles, as detected by Twitch-2B. **(A)** Representative transmitted light and CFP + YFP fluorescence images of a follicle after a 28-hour culture on a Millicell membrane. Prior to flattening on the membrane, the follicle measured  $\sim 180 \mu\text{m}$  in diameter. Note that the residual theca cells that surround the follicle and that were not removed by dissection show higher fluorescence intensity than the granulosa cells, indicating the presence of more Twitch-2B protein in the theca cells. **(B)** Representative traces showing changes in YFP and CFP fluorescence before and after perfusion with control medium ( $\text{MEM}\alpha$ ) or 1 nM FSH. Following FSH perfusion, the two channels change in opposite directions, indicating an increase in FRET (same follicle as A). **(C)** Representative trace showing the YFP/CFP ratio before and after treatment with 1 nM FSH (same follicle as B). The increase in YFP/CFP ratio indicates that 1 nM FSH induces a transient  $\text{Ca}^{2+}$  increase in the granulosa cells. **(D)** Both 1 nM and 100 nM FSH induce  $\text{Ca}^{2+}$  increases of similar magnitude. Peak YFP/CFP ratios during perfusion of control medium ( $\text{MEM}\alpha$ ) and the indicated concentrations of FSH. Follicle diameters at the time of isolation from the ovary were 140-250  $\mu\text{m}$ . **(E)** The  $\text{Ca}^{2+}$  response to 1 nM FSH is similar in follicles of different sizes. Peak YFP/CFP ratios before and after perfusion of 1 nM FSH, for follicles of the indicated diameters (those in the 140-180  $\mu\text{m}$  and 220-250  $\mu\text{m}$  groups are the same follicles as in A). Numbers within the bars indicate the number of follicles tested. Different letters indicate significant differences ( $p < 0.05$ ) after one-way ANOVA (D) or two-way ANOVA (E), followed by t-tests with the Holm-Sidak correction for multiple comparisons. For (E), lowercase letters indicate comparisons among  $\text{MEM}\alpha$  groups; uppercase letters reflect comparisons between groups treated with FSH. All values represent mean  $\pm$  s.e.m.

**Figure 2.** FSH induces a similar  $\text{Ca}^{2+}$  increase in nearly all outer granulosa cells, as detected with GCaMP6s. **(A)** ~220  $\mu\text{m}$ -diameter small antral follicle from a mouse expressing the GCaMP6s  $\text{Ca}^{2+}$  sensor. GCaMP6s increases in brightness with increasing  $\text{Ca}^{2+}$  levels, allowing  $\text{Ca}^{2+}$  rises in individual cells to be visualized. The yellow box shows the area of enlargements at different time points before and after FSH perfusion; the time points corresponding to these images are marked on the traces in **(B)** with vertical dashed lines. Yellow circles highlight the regions of interest (ROIs) (10  $\mu\text{m}$  diameter), positioned approximately over single cells, that were measured to generate the traces in **(B)**. Note that after FSH, the entire outer granulosa layer increases in brightness to a similar extent. Scale bar in full image is 50  $\mu\text{m}$ ; scale bars in cropped images represent 25  $\mu\text{m}$ . Supplementary movie S1 shows the entire time series from which these images were selected. **(B)** GCaMP6s fluorescence intensity (relative  $\text{Ca}^{2+}$  levels) for each of the 4 ROIs labeled above. Note that the granulosa cells show a small  $\text{Ca}^{2+}$  transient in response to the mechanical stimulus during perfusion, independent of FSH. Representative of 6 follicles.

**Figure 3.** The FSH-induced  $\text{Ca}^{2+}$  increase in granulosa cells of intact follicles requires extracellular  $\text{Ca}^{2+}$ , but MAPK phosphorylation,  $17\beta$ -estradiol production, and LH-induced nuclear envelope breakdown occur independently of the  $\text{Ca}^{2+}$  increase. **(A)** Representative traces showing no FSH-induced  $\text{Ca}^{2+}$  increase in follicles (220-250  $\mu\text{m}$  diameter) in media with low extracellular  $\text{Ca}^{2+}$ , and no effect of the  $G_q$ -family G-protein inhibitor YM-254890 (10  $\mu\text{M}$ ) on the FSH-induced  $\text{Ca}^{2+}$  increase. MEM $\alpha$ , which contains 1.8 mM  $\text{CaCl}_2$ , was mixed with either 2 mM EGTA (~0.002 mM free  $\text{Ca}^{2+}$ ; upper panel), or 1.6 mM EGTA (~0.2 mM free  $\text{Ca}^{2+}$ ; middle panel). Follicles were pre-incubated for ~20 min in these EGTA solutions, or for 60 min in YM-254890

(lower panel), before addition of FSH. **(B)** Peak YFP/CFP ratios before and after perfusion of 1 nM FSH in the presence of varying extracellular  $\text{Ca}^{2+}$  concentrations, buffered by EGTA addition as in A, or in the presence of YM-254890 (10  $\mu\text{M}$ ). The ability of YM-254890 to inhibit LH-induced  $\text{Ca}^{2+}$  elevation (see Figs 4E and 6A,B below) served as a positive control for the permeability of this inhibitor. Open bars indicate the peak YFP/CFP ratio after  $\text{MEM}\alpha$  perfusion; filled bars indicate peak YFP/CFP ratio following FSH perfusion. For all treatment groups, the peak ratios following FSH perfusion were compared to the control (green) bar by unpaired t-tests. Asterisks indicate significant differences following the Holm-Sidak correction for multiple t-tests; \*\* indicates  $p < 0.01$ , \*\*\*\* indicates  $p < 0.0001$ , n.s. indicates  $p > 0.05$ . **(C)** FSH-induced MAPK phosphorylation occurs independently of extracellular  $\text{Ca}^{2+}$ . Left: Representative western blot for phospho- and total MAPK in lysates of 180-250  $\mu\text{m}$  follicles incubated for 20-30 min in medium with either 1.8 mM or 0.2 mM  $\text{Ca}^{2+}$  (prepared as in A), and then for 20 min in these same media with or without 1 nM FSH. Right: Ratio of phospho-/total MAPK from 3 independent experiments; n.s. indicates  $p > 0.05$  by unpaired t-test. **(D)** FSH-induced estradiol production occurs independently of extracellular  $\text{Ca}^{2+}$ . 290-360  $\mu\text{m}$  follicles were incubated with 1 nM FSH in media containing either 1.8 mM or 0.2 mM  $\text{Ca}^{2+}$ . Medium samples were collected at the indicated times for estradiol analysis. Each point represents 3 experiments using 14-20 follicles for each treatment. **(E)** FSH-induced acquisition of LH responsiveness occurs independently of extracellular  $\text{Ca}^{2+}$ . 290-360  $\mu\text{m}$  follicles were incubated for 24 hours with 1 nM FSH in media with either 1.8 mM or 0.2 mM  $\text{Ca}^{2+}$ ; 10 nM LH was then added to each dish and the time course of nuclear envelope breakdown was determined. Each point represents 3 experiments using 12-19 follicles for each condition. Same legend as in (D). Values in (B-E) represent mean  $\pm$  s.e.m.

**Figure 4:** LH causes a  $G_q$ -family G-protein-dependent increase in mural granulosa  $Ca^{2+}$ , as detected with Twitch-2B. **(A)** Transmitted light and CFP + YFP fluorescence images of a large antral follicle after 25-hour culture on a Millicell membrane in the presence of 1 nM FSH. Prior to flattening on the membrane, the follicle measured  $\sim 320 \mu m$  in diameter. Note that the theca cells express more Twitch-2B than the granulosa cells. **(B)** YFP and CFP fluorescence for the follicle shown in (A) during sequential perfusions of MEM $\alpha$ , 10 nM LH, and 300 nM LH. **(C)** YFP/CFP ratio during sequential perfusions of MEM $\alpha$ , 10 nM LH, and 300 nM LH, for the follicle shown in B. **(D)** Peak YFP/CFP ratios before and after perfusion of 10 nM and 300 nM LH. Different letters indicate significant differences ( $p < 0.001$ ) after repeated measures ANOVA with the Holm-Sidak correction for multiple comparisons. **(E)** Peak YFP/CFP ratios before and after perfusion of 300 nM LH, following inhibition of  $G_q$ -family G-proteins by a 1-2.5 hour pretreatment with 10  $\mu M$  YM-254890; n.s. indicates  $p > 0.05$  by paired t-test. Values in (D,E) represent mean  $\pm$  s.e.m.

**Figure 5.** As detected with GCaMP6s, 10 nM LH induces  $Ca^{2+}$  oscillations in a subset of mural granulosa cells closest to the basal lamina, while 300 nM LH causes a  $Ca^{2+}$  increase throughout the outer 25  $\mu m$  region. **(A)** Image at left shows a large antral follicle after 25-hour culture on a Millicell membrane in the presence of 1 nM FSH. The yellow box outlines the area of enlargement to show the outer mural granulosa cells and a single-cell theca layer in this region. The measured ROI (10  $\mu m$  in diameter), circled in yellow, corresponds approximately to a mural granulosa cell (cell "a") next to the basement membrane that undergoes many  $Ca^{2+}$  oscillations only after exposure to 10 nM LH. Some other outer mural cells (cells "b-e" marked by arrowheads in images 3-7), but not all mural granulosa cells, also exhibit oscillations that are not synchronized with cell "a". In contrast, all outer mural granulosa cells exhibit a large, rapid

increase in  $\text{Ca}^{2+}$  after perfusion of 300 nM LH (image 8). Note that cells in the theca layer, including the 3 flat-shaped cells seen adhering to the follicle in the enlarged images, also show  $\text{Ca}^{2+}$  oscillations, even in the absence of LH. Scale bar in the enlarged images is 25  $\mu\text{m}$ .

Supplementary movie S2 shows the entire time series from which these images were selected, and supplementary movie S3 shows another example. **(B)** Fluorescence intensity of cell “a” in MEM $\alpha$  (first 5 minutes), and in response to 10 nM and 300 nM LH. Images were taken at 10-sec intervals. Points in red correspond to the numbered images in (A). Representative of 4 follicles.

**(C)**  $\text{Ca}^{2+}$  oscillations continue to be observed in the outer mural granulosa cells 6 hours after treatment with 10 nM LH. The measured ROI (10  $\mu\text{m}$  in diameter), circled in yellow, corresponds approximately to an oscillating granulosa cell represented in the graph. The red point on the graph represents the time point of the image in (C). Representative of 2 follicles each at 1, 2, and 4 hours, and 3 follicles at 6 hours after LH. Supplementary movie S4 shows an example at 2 hours after LH, and supplementary movie S5 shows the full time series from which these images at 6 hours after LH were selected.

**Figure 6.** The  $G_q$ -family G-protein inhibitor YM-254890 prevents the  $\text{Ca}^{2+}$  increases in response to LH, and slightly attenuates ovulation. In all panels, follicles 290-360  $\mu\text{m}$  in diameter were cultured ~24 hours in the presence of 1 nM FSH, then pre-incubated in either 0.1% DMSO or 10  $\mu\text{M}$  YM-254890 for 60 min before adding 10 nM LH. **(A,B)** Lack of LH-induced  $\text{Ca}^{2+}$  oscillations and rises in the mural granulosa cells of a GCaMP6s-expressing follicle in the presence of 10  $\mu\text{M}$  YM-254890. The measured ROI in (A) (10  $\mu\text{m}$  in diameter), circled in yellow, corresponds approximately to a mural granulosa cell represented in the graph (B). Supplementary movie S6 shows the entire time series from which these images were selected. Representative of 3 follicles. **(C)** Inhibition of  $G_q$ -family G-proteins does not affect the timing of LH-induced oocyte nuclear envelope breakdown. **(D)** Inhibition of  $G_q$ -family G-proteins reduces the percent of

follicles shown in (C) that had ovulated by 24 hours after adding 10 nM LH. Data in (C,D) represent the mean  $\pm$  s.e.m of 3 experiments with 10-13 follicles each. \*\* indicates  $p < 0.01$  by paired t-test.



**Figure 1**

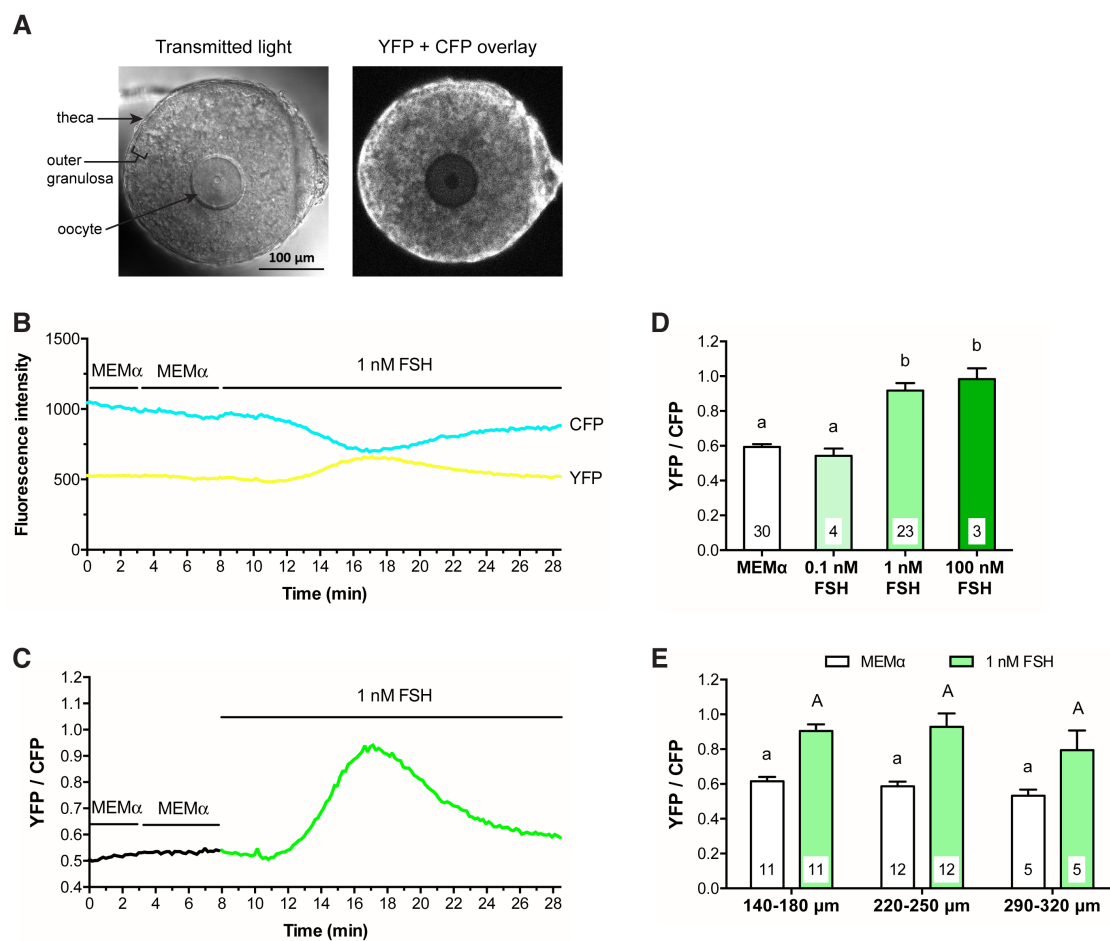

Figure 2

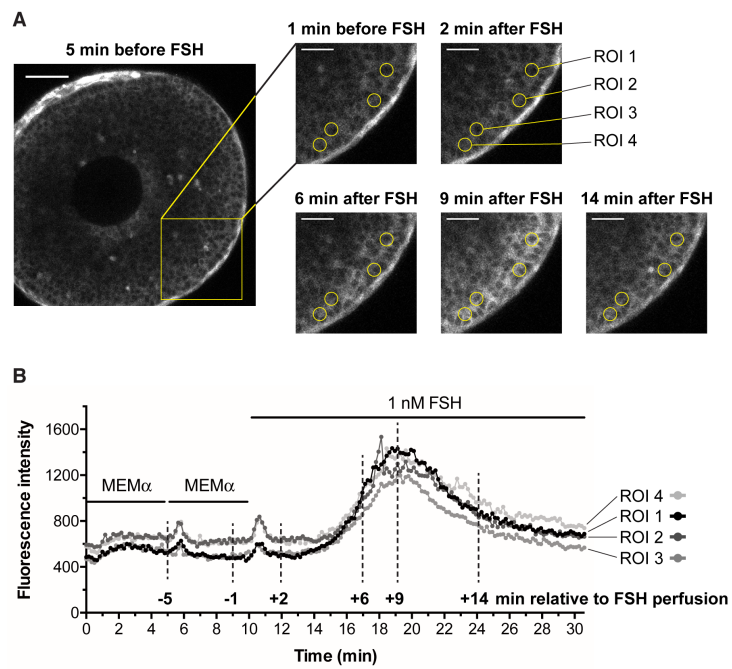

**Figure 3**

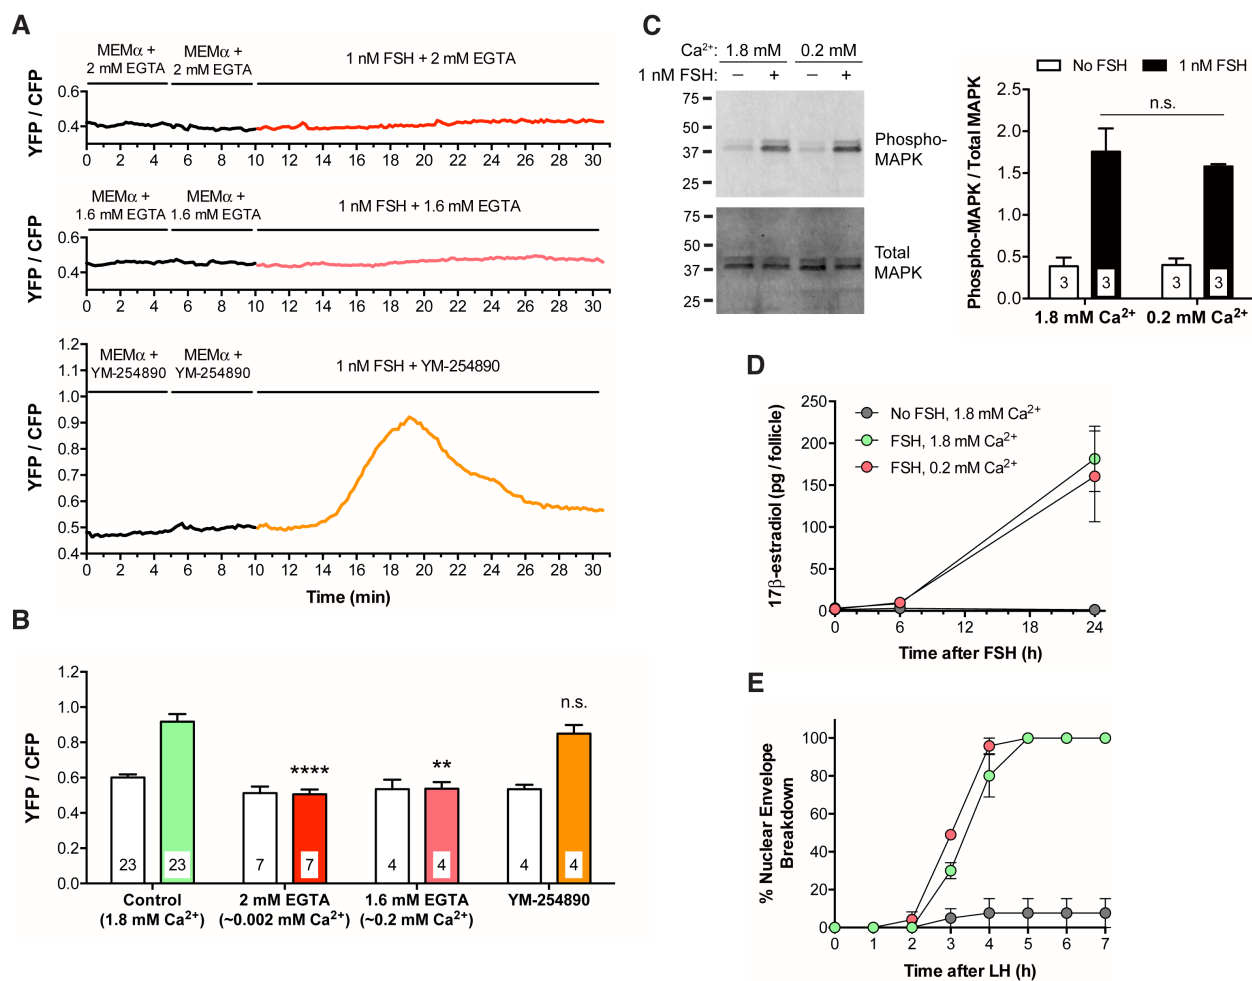

Figure 4

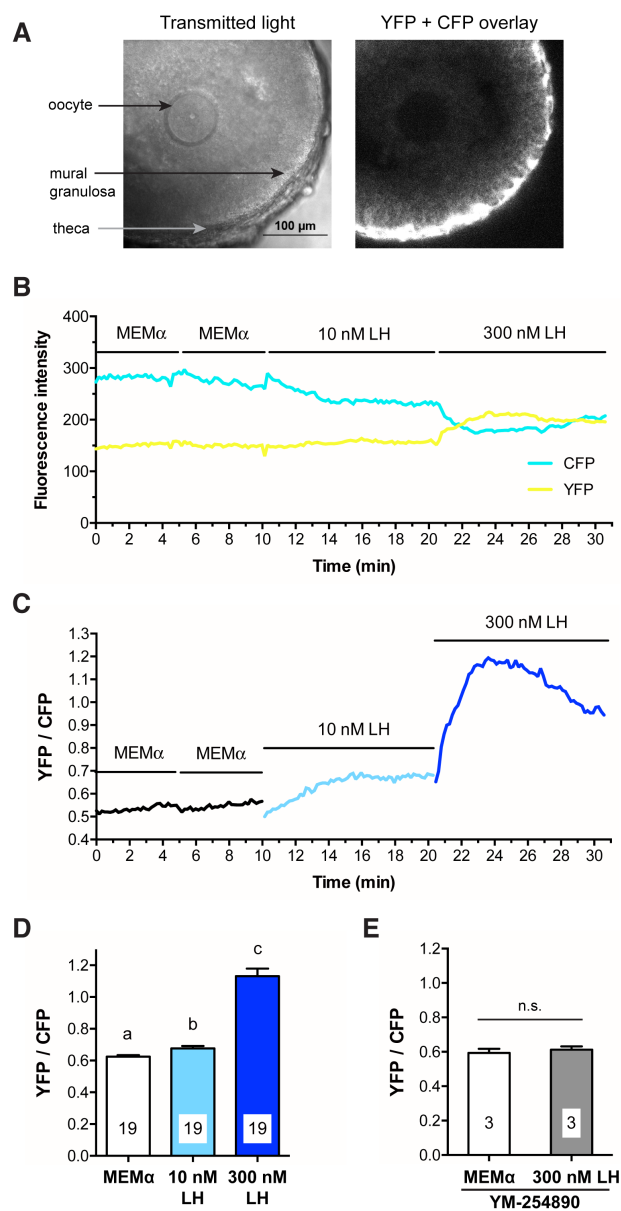

Figure 5

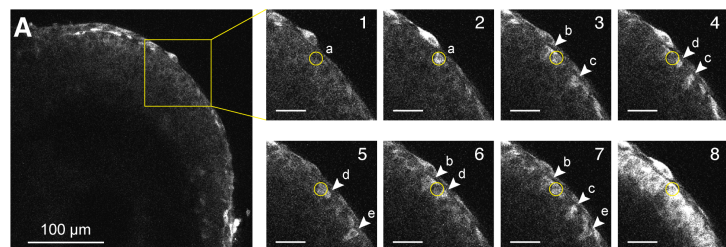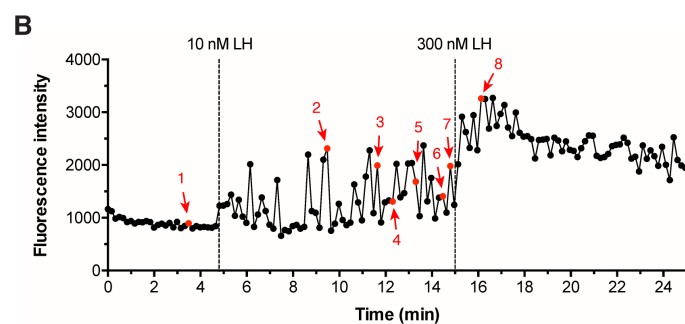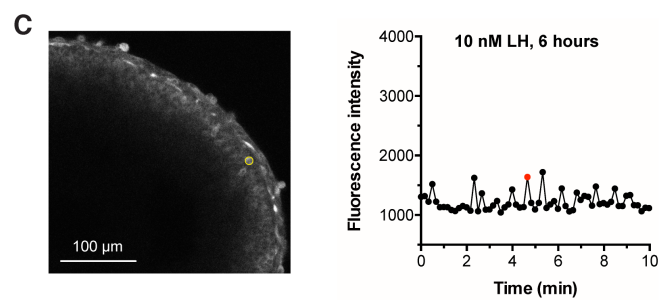

Figure 6

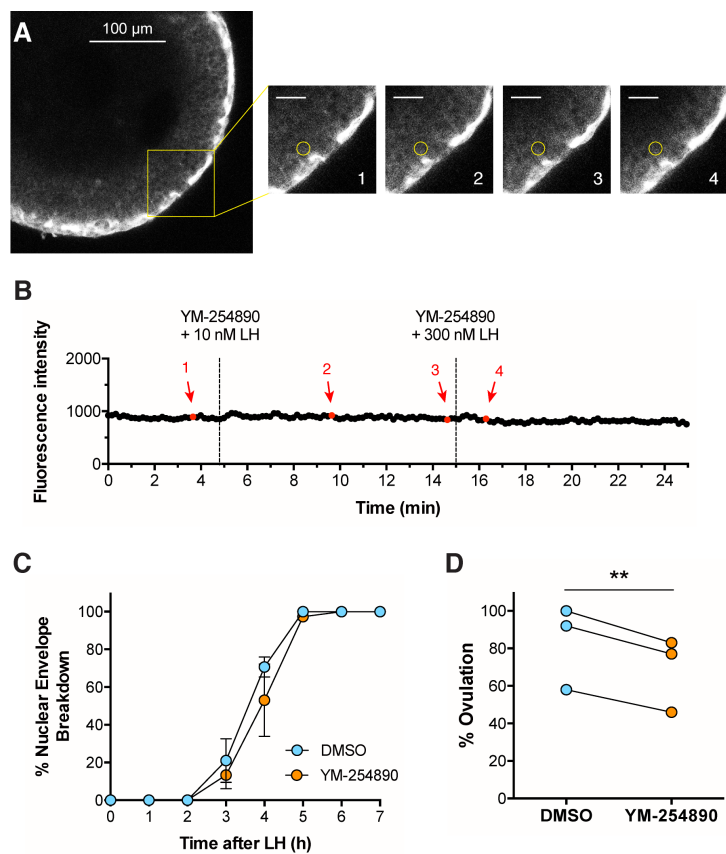

Source: https://www.biorxiv.org/content/10.1101/520122v1.full.pdf
